# Supplementary material for: Interventions to Promote Healthy Meals in Full-Service Restaurants and Canteens: A Systematic Review and Meta-Analysis
Source: MDPI journal article supplement (doi:10.3390/nu13041350), 2021-04-18
Supplement: s1 [file s1]

**Figure S1:** Forest plots of the included intervention meta-analysis.

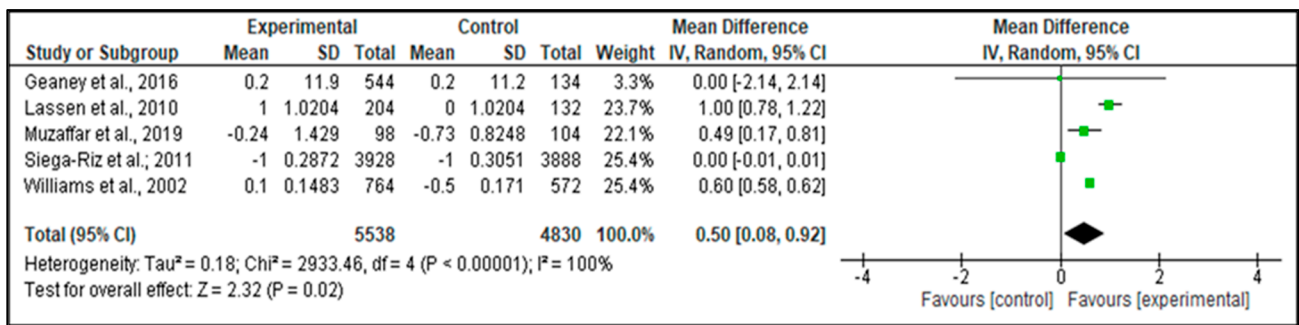

Forest plot of the effectiveness of increasing the dietary intake of fiber (g/day) according to the included intervention studies (RCTs and non-RCTs).

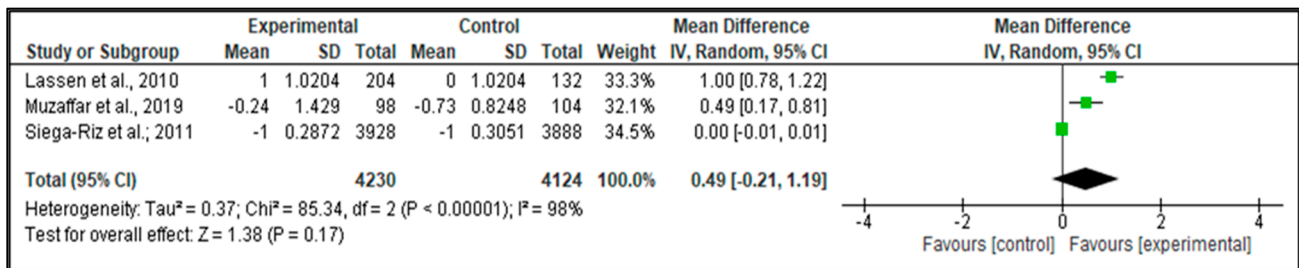

Forest plot of the effectiveness of increasing the dietary intake of fiber (g/day) according to the included intervention studies (RCTs only).

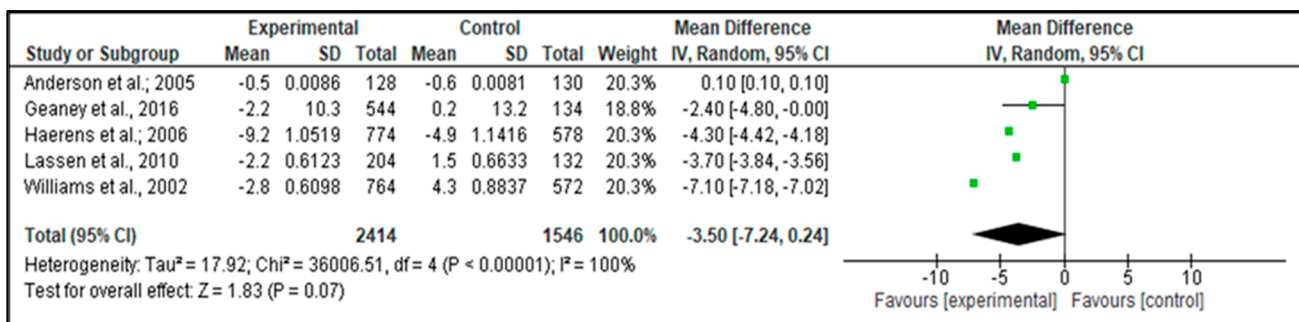

Forest plot of the effectiveness of decreasing the percentage of energy derived from fat (%E/day) according to the included intervention studies (RCTs and non-RCTs).

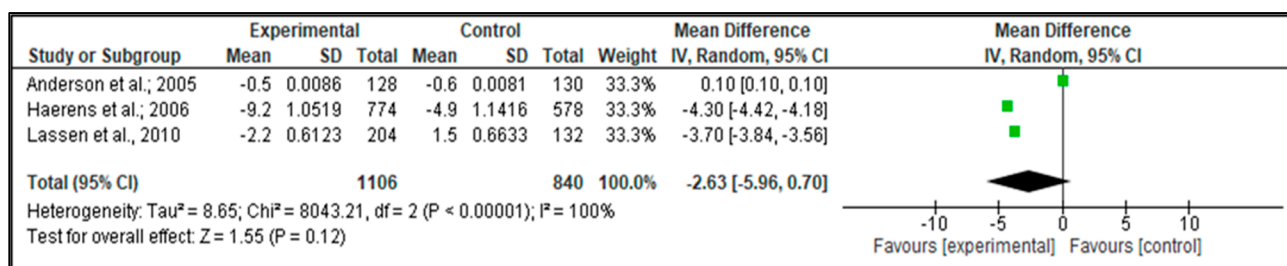

Forest plot of the effectiveness of decreasing the percentage of energy derived from fat (%E/day) according to the included intervention studies (RCTs only).

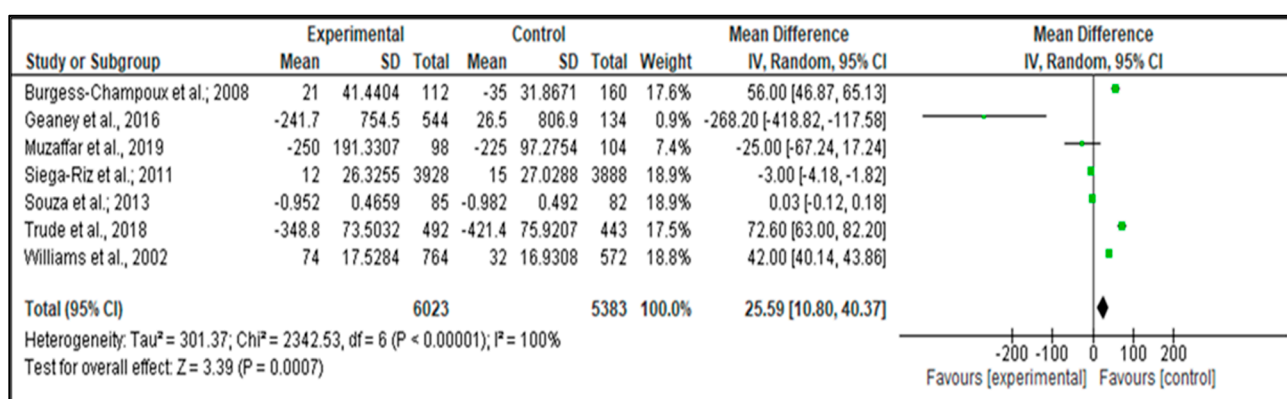

Forest plot of the effectiveness of decreasing the total daily caloric intake (kcal/day) according to the included intervention studies (RCTs and non-RCTs).

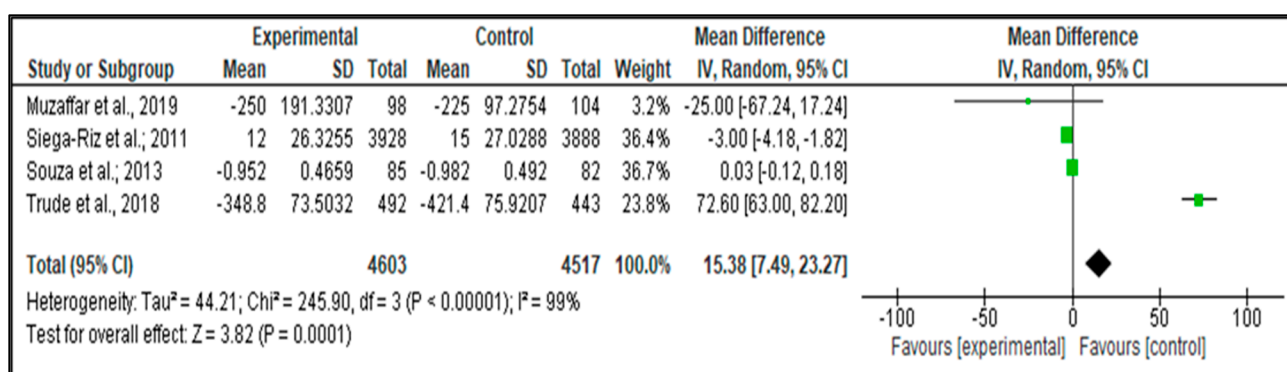

Forest plot of the effectiveness of decreasing the total daily caloric intake (kcal/day) according to the included intervention studies (RCTs only).

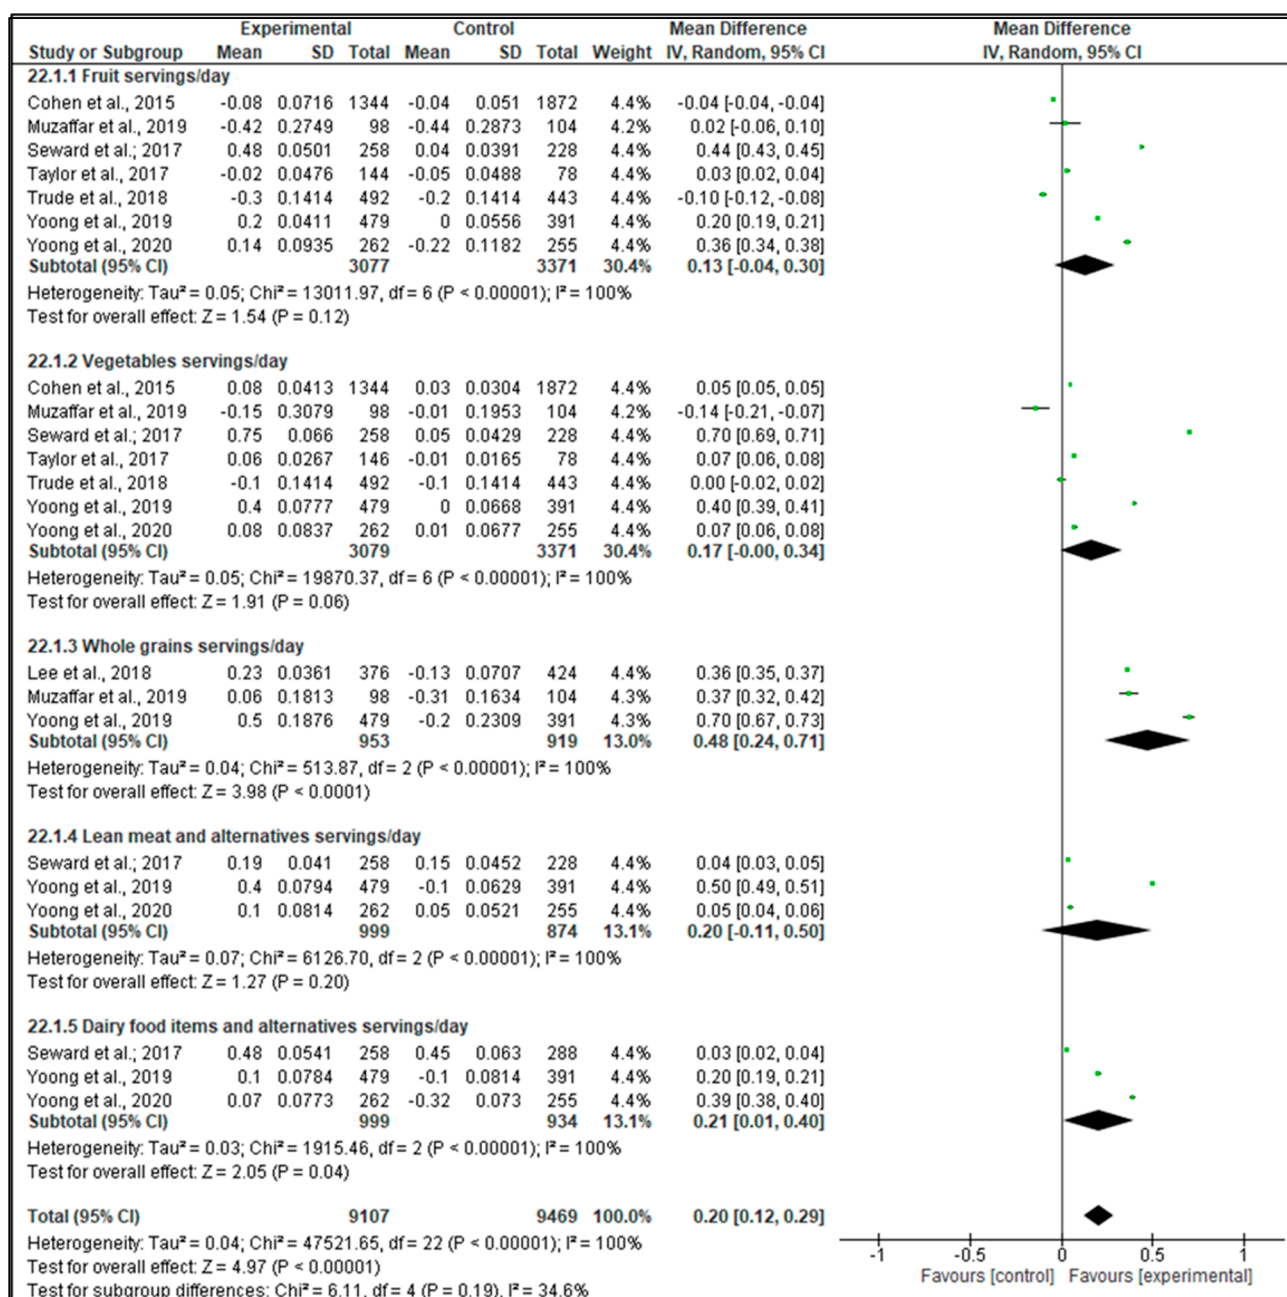

Forest plot of the effectiveness of increasing the dietary intake of healthy food items (servings/day), according to the included intervention studies (RCTs only).

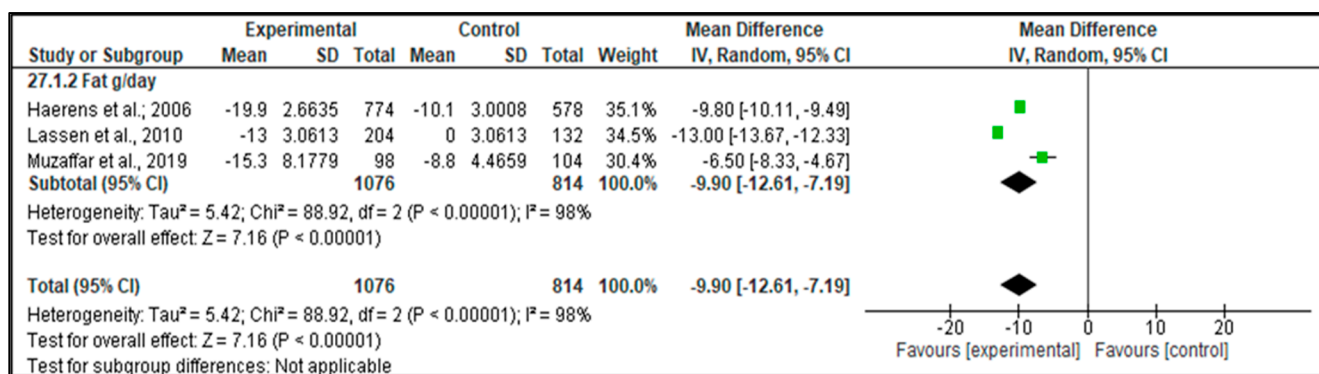

Forest plot of the effectiveness of decreasing the dietary intake of saturated fat, fat, and added sugar nutrients (g/day), according to the included intervention studies (RCTs only).
