# Supplementary material for: Interventions to Promote Healthy Meals in Full-Service Restaurants and Canteens: A Systematic Review and Meta-Analysis
Source: MDPI journal article supplement (doi:10.3390/nu13041350), 2021-04-18
Supplement: s1 [file s1]

**Table S3:** Quality of the included intervention studies.

| <b>Included studies</b>    | <b>Selection bias</b> | <b>Study design</b> | <b>Confounders</b> | <b>Blinding</b> | <b>Data collection methods</b> | <b>Withdrawals and dropouts</b> | <b>Quality</b> |
|----------------------------|-----------------------|---------------------|--------------------|-----------------|--------------------------------|---------------------------------|----------------|
| Ayala et al.; 2017.        | Weak                  | Strong              | Weak               | Weak            | Weak                           | Weak                            | WEAK           |
| Anderson et al.; 2005.     | Weak                  | Strong              | Weak               | Weak            | Weak                           | Weak                            | WEAK           |
| Beets et al.; 2016.        | Weak                  | Strong              | Moderate           | Weak            | Weak                           | Weak                            | WEAK           |
| Bogart et al.; 2014.       | Moderate              | Strong              | Weak               | Weak            | Weak                           | Moderate                        | WEAK           |
| Cohen et al.; 2014.        | Moderate              | Strong              | Weak               | Weak            | Weak                           | Weak                            | WEAK           |
| Cohen et al.; 2015.        | Weak                  | Strong              | Weak               | Weak            | Weak                           | Weak                            | WEAK           |
| Delaney et al.; 2017.      | Weak                  | Strong              | Weak               | Weak            | Weak                           | Strong                          | WEAK           |
| Giles et al.; 2012.        | Moderate              | Strong              | Moderate           | Weak            | Weak                           | Strong                          | WEAK           |
| Grady et al.; 2020.        | Moderate              | Strong              | Weak               | Weak            | Weak                           | Strong                          | WEAK           |
| Habib-Mourad et al.; 2014. | Strong                | Strong              | Weak               | Weak            | Weak                           | Strong                          | WEAK           |

|                               |          |        |          |      |          |          |      |
|-------------------------------|----------|--------|----------|------|----------|----------|------|
| Haerens et al.; 2006.         | Weak     | Strong | Moderate | Weak | Moderate | Moderate | WEAK |
| Kenney et al.; 2015.          | Moderate | Strong | Weak     | Weak | Weak     | Strong   | WEAK |
| Lassen et al.; 2010.          | Moderate | Strong | Moderate | Weak | Weak     | Weak     | WEAK |
| Lee et al.; 2018.             | Moderate | Strong | Moderate | Weak | Weak     | Moderate | WEAK |
| Martínez-Donate et al.; 2015. | Weak     | Strong | Weak     | Weak | Weak     | Weak     | WEAK |
| Morshed et al.; 2016.         | Weak     | Strong | Moderate | Weak | Weak     | Weak     | WEAK |
| Muzaffar et al.; 2019.        | Weak     | Strong | Weak     | Weak | Weak     | Weak     | WEAK |
| Nathan et al.; 2016.          | Weak     | Strong | Weak     | Weak | Moderate | Strong   | WEAK |
| Ochoa-Avilés et al.; 2017.    | Weak     | Strong | Moderate | Weak | Weak     | Moderate | WEAK |
| Rosmawati et al.; 2017.       | Weak     | Strong | Weak     | Weak | Weak     | Weak     | WEAK |
| Seward et al.; 2017.          | Moderate | Strong | Weak     | Weak | Moderate | Moderate | WEAK |
| Siega-Riz et al.; 2011.       | Strong   | Strong | Moderate | Weak | Weak     | Weak     | WEAK |

|                         |          |        |          |      |          |          |      |
|-------------------------|----------|--------|----------|------|----------|----------|------|
| Souza et al.; 2014.     | Strong   | Strong | Moderate | Weak | Weak     | Strong   | WEAK |
| Story et al.; 2003.     | Weak     | Strong | Weak     | Weak | Weak     | Weak     | WEAK |
| Taylor et al.; 2017.    | Weak     | Strong | Weak     | Weak | Weak     | Moderate | WEAK |
| Thorndike et al.; 2016. | Weak     | Strong | Weak     | Weak | Week     | Strong   | WEAK |
| Trude et al.; 2018.     | Weak     | Strong | Moderate | Weak | Weak     | Moderate | WEAK |
| Warren et al.; 2003     | Moderate | Strong | Weak     | Weak | Moderate | Strong   | WEAK |
| Webb et al.; 2011.      | Weak     | Strong | Weak     | Weak | Weak     | Weak     | WEAK |
| Wolfenden et al.; 2015. | Weak     | Strong | Weak     | Weak | Weak     | Strong   | WEAK |
| Wolfenden et al.; 2017. | Strong   | Strong | Moderate | Weak | Weak     | Strong   | WEAK |
| Wyse et al.; 2019.      | Weak     | Strong | Weak     | Weak | Weak     | Strong   | WEAK |
| Yoong et al.; 2016.     | Moderate | Strong | Moderate | Weak | Weak     | Moderate | WEAK |
| Yoong et al.; 2019.     | Moderate | Strong | Weak     | Weak | Strong   | Moderate | WEAK |

|                                |          |        |          |      |          |          |      |
|--------------------------------|----------|--------|----------|------|----------|----------|------|
| Yoong et al.; 2020.            | Moderate | Strong | Weak     | Weak | Weak     | Moderate | WEAK |
| Bell et al.; 2014.             | Strong   | Strong | Moderate | Weak | Weak     | Weak     | WEAK |
| Bogart et al.; 2011.           | Weak     | Strong | Weak     | Weak | Weak     | Moderate | WEAK |
| Burgess-Champoux et al.; 2008. | Weak     | Strong | Weak     | Weak | Moderate | Strong   | WEAK |
| Geaney et al.; 2016.           | Strong   | Strong | Weak     | Weak | Moderate | Moderate | WEAK |
| Quinn et al.; 2018.            | Moderate | Strong | Moderate | Weak | Strong   | Weak     | WEAK |
| Williams et al.; 2002.         | Weak     | Strong | Weak     | Weak | Weak     | Weak     | WEAK |

The included studies in the present systematic review are sorted in the following table by RCTs and Non-RCTs, and by alphabetical order.
