# Supplementary material for: Interventions to Promote Healthy Meals in Full-Service Restaurants and Canteens: A Systematic Review and Meta-Analysis
Source: Nutrients. 2021 Apr 18;13(4):1350. doi: 10.3390/nu13041350 (PMC8073122; doi:10.3390/nu13041350)
Supplement: Supplementary file 1 [file nutrients-13-01350-s001.zip]

Archive with 4 entries (4 files):
- Figure S1_Forest plots of the included intervention meta-analysis_.pdf
- Table S1_PRISMA 2009 Checklist.pdf
- Table S2_Included intervention study results.pdf
- Table S3_Quality of the included intervention studies.pdf
